# Supplementary material for: Micelle-provided microenvironment facilitating the formation of single-handed helical polymer-based nanoparticles
Source: Royal Society of Chemistry journal article supplement (doi:10.1039/c6ra10610b), 2016-01-01
Supplement: c6ra10610b1.pdf [file c6ra10610b1.pdf]

Micelle-provided microenvironment facilitating the formation of single-handed  
helical polymer-based nanoparticles

Biao Zhao<sup>a,b</sup> and Jianping Deng<sup>a,b\*</sup>

<sup>a</sup> State Key Laboratory of Chemical Resource Engineering, Beijing University of  
Chemical Technology, Beijing 100029, China

<sup>b</sup> College of Materials Science and Engineering, Beijing University of Chemical  
Technology, Beijing 100029, China

E-mail:

dengjp@mail.buct.edu.cn

**Table S1.** GPC data of polyM obtained by emulsion polymerizations in the presence of (nbd)Rh<sup>+</sup>B<sup>-</sup>(C<sub>6</sub>H<sub>5</sub>)<sub>4</sub> and chiral additive.

| Run. | chiral additive | $M_n^a$ | $M_w/M_n^a$ |
|------|-----------------|---------|-------------|
| 1    | R-PEA           | 8100    | 1.72        |
| 2    | S-PEA           | 9000    | 1.70        |
| 3    | none            | 9200    | 1.77        |
| 4    | R(S)-PEA        | 9400    | 1.59        |
| 5    | D-menthol       | 9500    | 1.75        |
| 6    | L-menthol       | 8300    | 1.73        |

<sup>a</sup> Determined by GPC (polystyrenes as standards, THF as eluent).

**Table S2.** GPC data of polyM obtained by emulsion polymerizations in the presence of [(nbd)RhCl]<sub>2</sub> and chiral additive.

| Run. | chiral additive | $M_n^a$ | $M_w/M_n^a$ |
|------|-----------------|---------|-------------|
| 1    | R-PEA           | 7400    | 1.64        |
| 2    | S-PEA           | 7600    | 1.41        |
| 3    | D-menthol       | 10200   | 1.77        |
| 4    | L-menthol       | 9400    | 1.59        |

<sup>a</sup> Determined by GPC (polystyrenes as standards, THF as eluent).

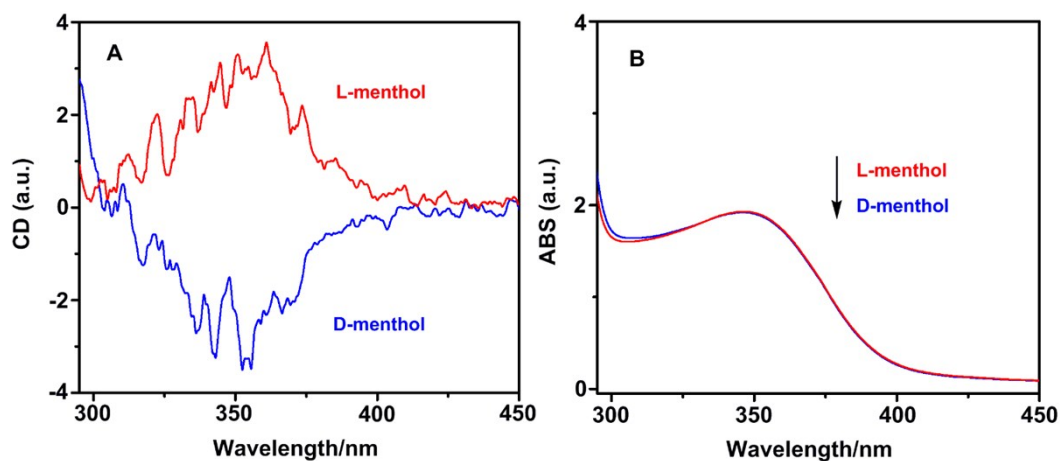

**Figure. S1.** (A) CD and (B) UV-vis spectra of polyM emulsions in the presence of  $[(nbd)RhCl]_2$  and chiral menthol. The spectra were recorded at 25 °C.

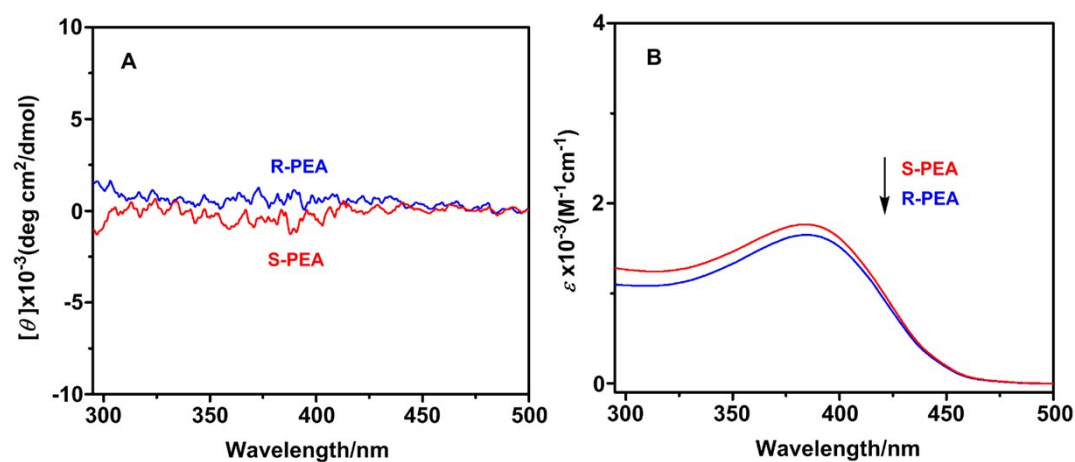

**Figure. S2.** (A) CD and (B) UV-vis spectra of polyM solutions after solution polymerization in the presence of  $[(nbd)RhCl]_2$  and chiral PEA. The solution concentration was approximately 1 mmol/L by monomer units. The spectra were recorded at 25 °C.

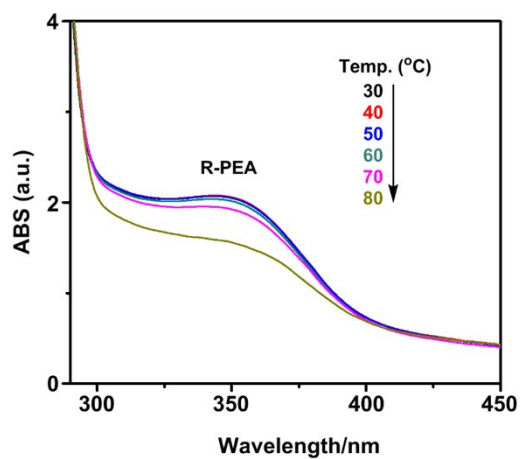

**Figure S3.** Effects of temperature on UV-vis spectra of polyM emulsion obtained by HSSEP in the presence of R-PEA.

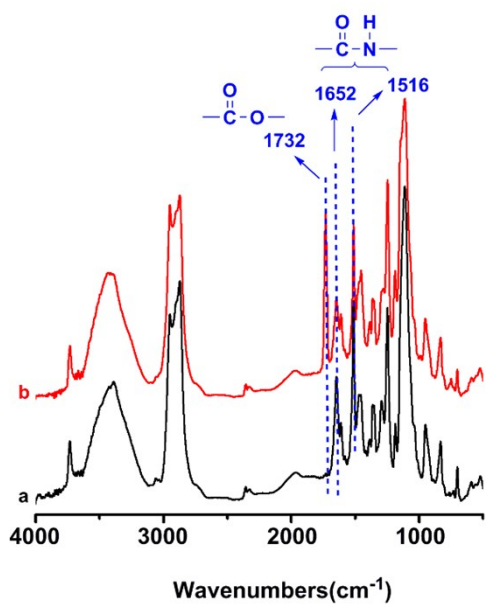

**Figure S4.** FT-IR spectra of (a) pure polyM nanoparticles and (b) optically active core/shell nanoparticles (KBr tablet).

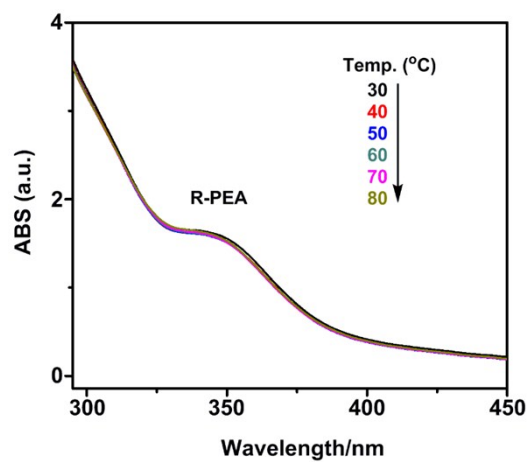

**Figure S5.** Effects of temperature on UV-vis spectra of core/shell nanoparticles in the presence of R-PEA.
